# Supplementary material for: Harnessing synchronous photothermal and photocatalytic effects of cryptomelane-type MnO2 nanowires towards clean water production
Source: Royal Society of Chemistry journal article supplement (doi:10.1039/d0ta10185k), 2020-12-21
Supplement: d0ta10185k1.pdf [file d0ta10185k1.pdf]

## Supporting Information

### **Harnessing synchronous photothermal and photocatalytic effect of cryptomelane-type MnO<sub>2</sub> nanowire towards clean water production**

*Bolei Chen,<sup>a,b†</sup> Xing Zhang,<sup>a,c†</sup> Yu Xia,<sup>d†</sup> Guangliang Liu,<sup>c</sup> Hongqian Sang,<sup>a</sup> Yumin Liu,<sup>a</sup> Jikang Yuan,<sup>e</sup> Jingfu Liu,<sup>b</sup> Chunyan Ma,<sup>b</sup> Yong Liang,<sup>a,c</sup> Maoyong Song,<sup>b,c\*</sup> Guibin Jiang<sup>b</sup>*

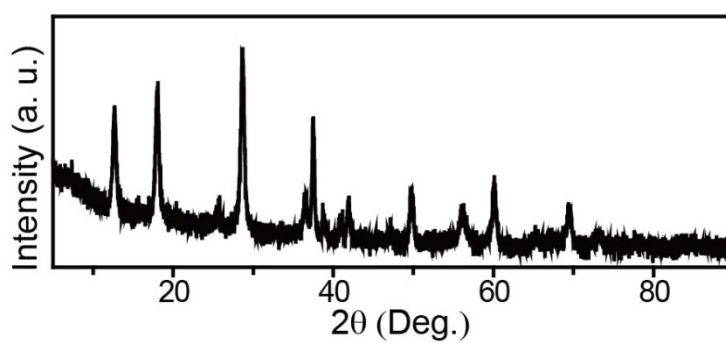

**Figure S1.** The X-Ray diffraction spectrum of the as-prepared cryptomelane-type MnO<sub>2</sub> nanowire.

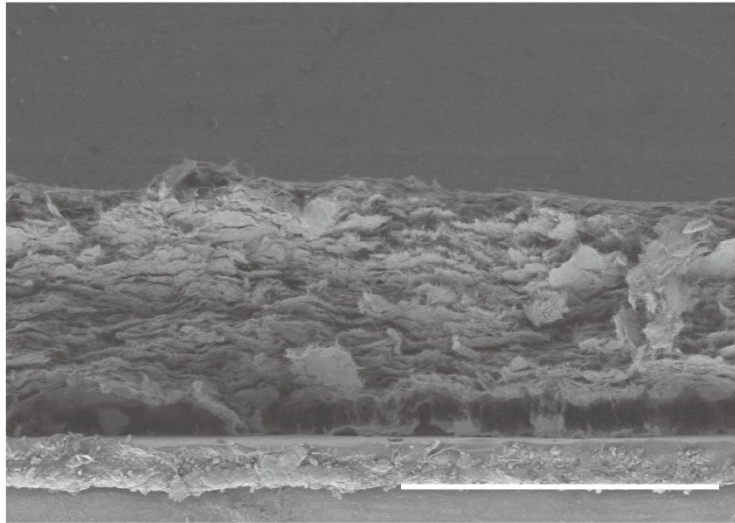

**Figure S2.** The cross – sectional SEM image of the MnO<sub>2</sub> light absorber. The scale bar is 1 mm.

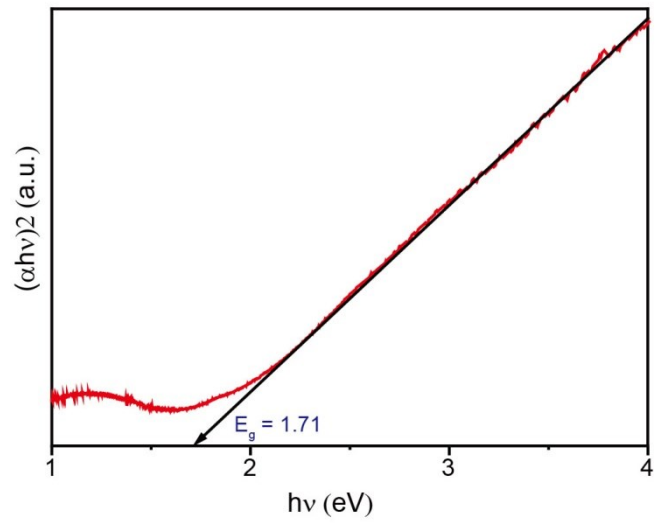

**Figure S3.** Calculation of optical bandgap from UV-Vis-NIR absorption spectrum of MnO<sub>2</sub> light absorber.

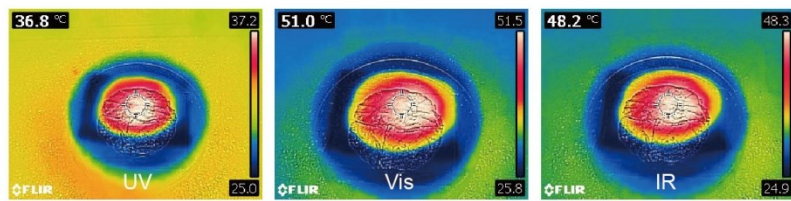

**Figure S4.** The IR images of the MnO<sub>2</sub> light absorber in solar generator under UV, Vis and IR irradiations. (The UV, Vis, and IR irradiations were filtered from solar simulator with intensity of 3 kW m<sup>-2</sup>)

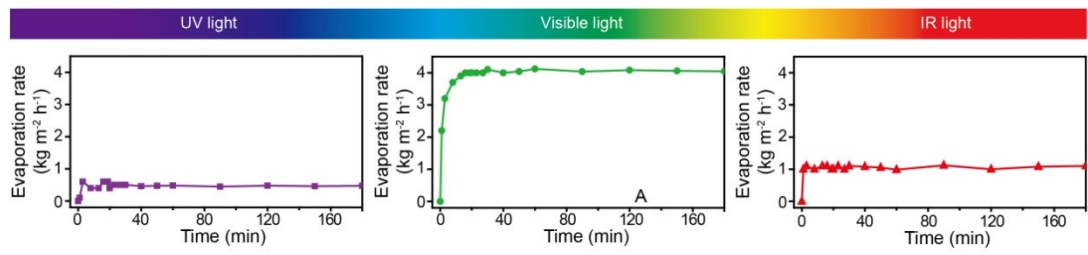

**Figure S5.** The evaporation rates of the device under UV, Vis, and IR light, respectively. The UV, Vis, and IR irradiances were filtered from solar simulator with intensity of 3 kW m<sup>-2</sup>.

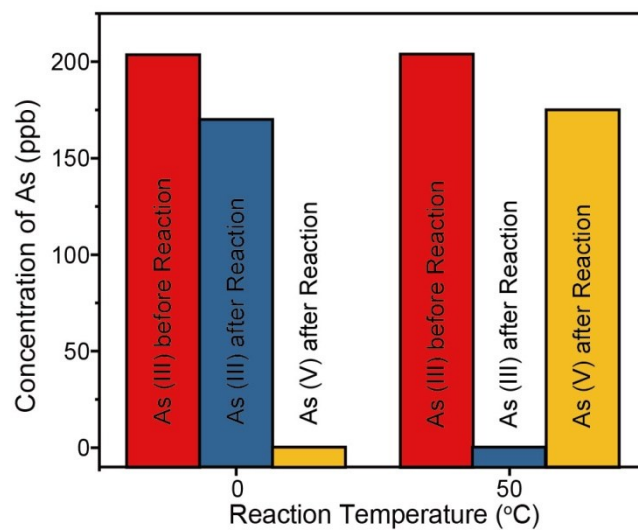

**Figure S6.** The thermodynamic As(III) oxidation reaction observed in MnO<sub>2</sub> suspension at 50 °C in dark.

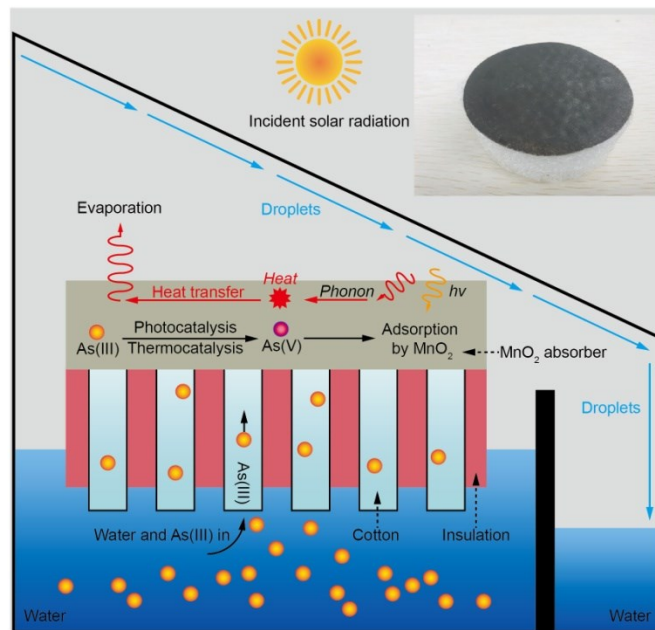

**Figure S7.** The design and digital image of  $\text{MnO}_2$  based solar steam generator.

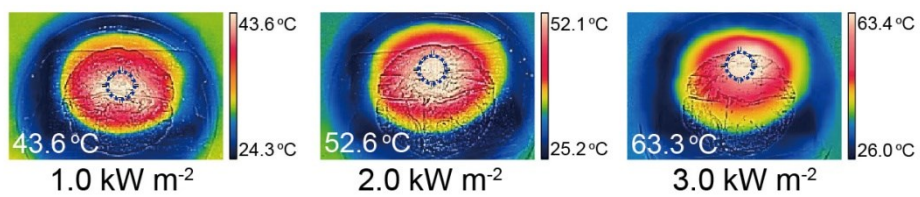

**Figure S8.** The IR images of the MnO<sub>2</sub> light absorber in solar generator under solar irradiation with different intensities.
